# Supplementary material for: Multimorbidity of communicable and non-communicable diseases in low- and middle-income countries: A systematic review
Source: PubMed Central journal article supplement (PMC9445468; doi:10.1177/26335565221112593), 2022-09-01
Supplement: sj-pdf-1-cob-10.1177_26335565221112593.pdf [file sj-pdf-1-cob-10.1177_26335565221112593.pdf]

**Author name, year, country of study**

Vancampfort D(2017) 48 LMICS

Stubbs B (2016) 48 LMICS

Rodriguez-Fernandez R(2016) Indonesia

Roche S(2017) South Africa

Pati S(2017) India

Chang AY(2019) South Africa

Chang AY(2019) South Africa, Mozambique

Ahmadi B(2016) Iran

Pati S(2020) India

Heerden (2017) South Africa

**Was the research question or objective in this paper clearly stated and appropriate**

**Was the study population clearly specified and defined**

Yes

**Were all the subjects selected or recruited from the same or similar populations (including the eligible persons at least 50% same time period)?**

|     |     |
|-----|-----|
| yes | No  |
| Yes | No  |
| Yes | Yes |
| Yes | Yes |
| Yes | Yes |
| Yes | Yes |
| Yes | No  |
| Yes | Yes |
| Yes | Yes |
| Yes | Yes |

| <b>Were inclusion and exclusion criteria for being in the study prespecified and applied uniformly to all participants?</b> | <b>Was a sample size justification, power description, or variance and effect estimates provided?</b> |
|-----------------------------------------------------------------------------------------------------------------------------|-------------------------------------------------------------------------------------------------------|
| Yes                                                                                                                         | NR                                                                                                    |
| Yes                                                                                                                         | N/A                                                                                                   |
| Yes                                                                                                                         | N/A                                                                                                   |
| Yes                                                                                                                         | N/A                                                                                                   |





| <b>Were the outcome measures (dependent variables) clearly defined, valid, reliable, and implemented consistently across all study participants?</b> | <b>Were the outcome assessors blinded to the exposure status of participants</b> | <b>Was loss to follow-up after baseline 20% or less?</b> |
|------------------------------------------------------------------------------------------------------------------------------------------------------|----------------------------------------------------------------------------------|----------------------------------------------------------|
| Yes                                                                                                                                                  | No                                                                               | N/A                                                      |
| Yes                                                                                                                                                  | No                                                                               | N/A                                                      |
| Yes                                                                                                                                                  | No                                                                               | N/A                                                      |
| Yes                                                                                                                                                  | No                                                                               | N/A                                                      |
| Yes                                                                                                                                                  | No                                                                               | N/A                                                      |
| Yes                                                                                                                                                  | No                                                                               | N/A                                                      |
| Yes                                                                                                                                                  | No                                                                               | N/A                                                      |
| Yes                                                                                                                                                  | No                                                                               | N/A                                                      |
| Yes                                                                                                                                                  | No                                                                               | N/A                                                      |

**Confounding variables measured and adjusted Quality Rating**

Yes GOOD

Yes GOOD

NR GOOD

NR GOOD

Yes GOOD

Yes GOOD

Yes GOOD

Yes GOOD

Yes GOOD

Yes GOOD

## **Comment**

multimorbidity clearly defined, self-report plus symptom-based diagnosis, large sample size, adjusted for confounders

Multimorbidity is clearly defined, descriptive analyses was done to characterize the study sample, inclusion and exclusion criteria was clear, information on missing data provided, sample size large enough, power of study is high

Multimorbidity was defined-use of multimorbidity wheel, no information on missing data handling, selection bias may have occurred due to convenient sampling (mine workers)

Multimorbidity was defined, selection bias may be present as the study excluded discharged and diseased patient's data as missing, adequate sample size and strong power of study

multimorbidity was clearly defined, self-report leads to chance of recall bias, inclusion and exclusion criteria clearly defined, sample size calculated and reported, missing data information missing

multimorbidity was clearly defined- two definitions given, missing data handling was reported, exclusion and inclusion criteria clear, self-report

concordant and discordant multimorbidity was clearly defined, information on missing data was reported+ missing data handling, self-report may have resorted in reporting bias

multimorbidity was well-defined, missing data reported and handling information provided, self-report may have resulted in recall bias, confounders adjusted

Multimorbidity was well-defined, sample size calculations were provided,



outcome and dependent variables were defined, adjustments for age and gender were done, self-report, no information on missing data handling was provided

Multimorbidity was well-defined, outcome and dependent measures were clearly outlines and defined, there was no information on the handling of missing data, adjustment for age and HIV status was sone

### Supplementary figures

**Figure S1: Age-related prevalence of CD and NCD multimorbidity**

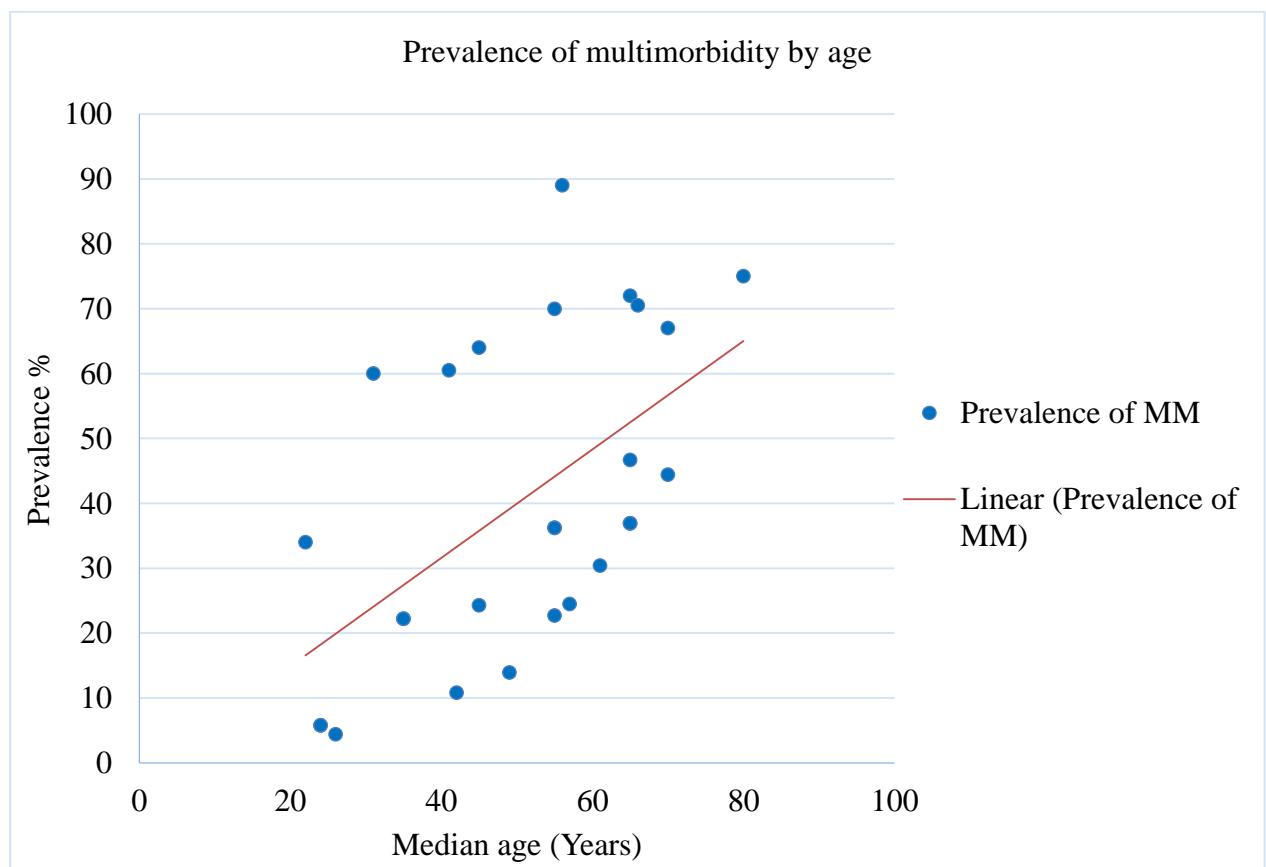

**Figure S2: Sex-related prevalence of CD and NCD multimorbidity**

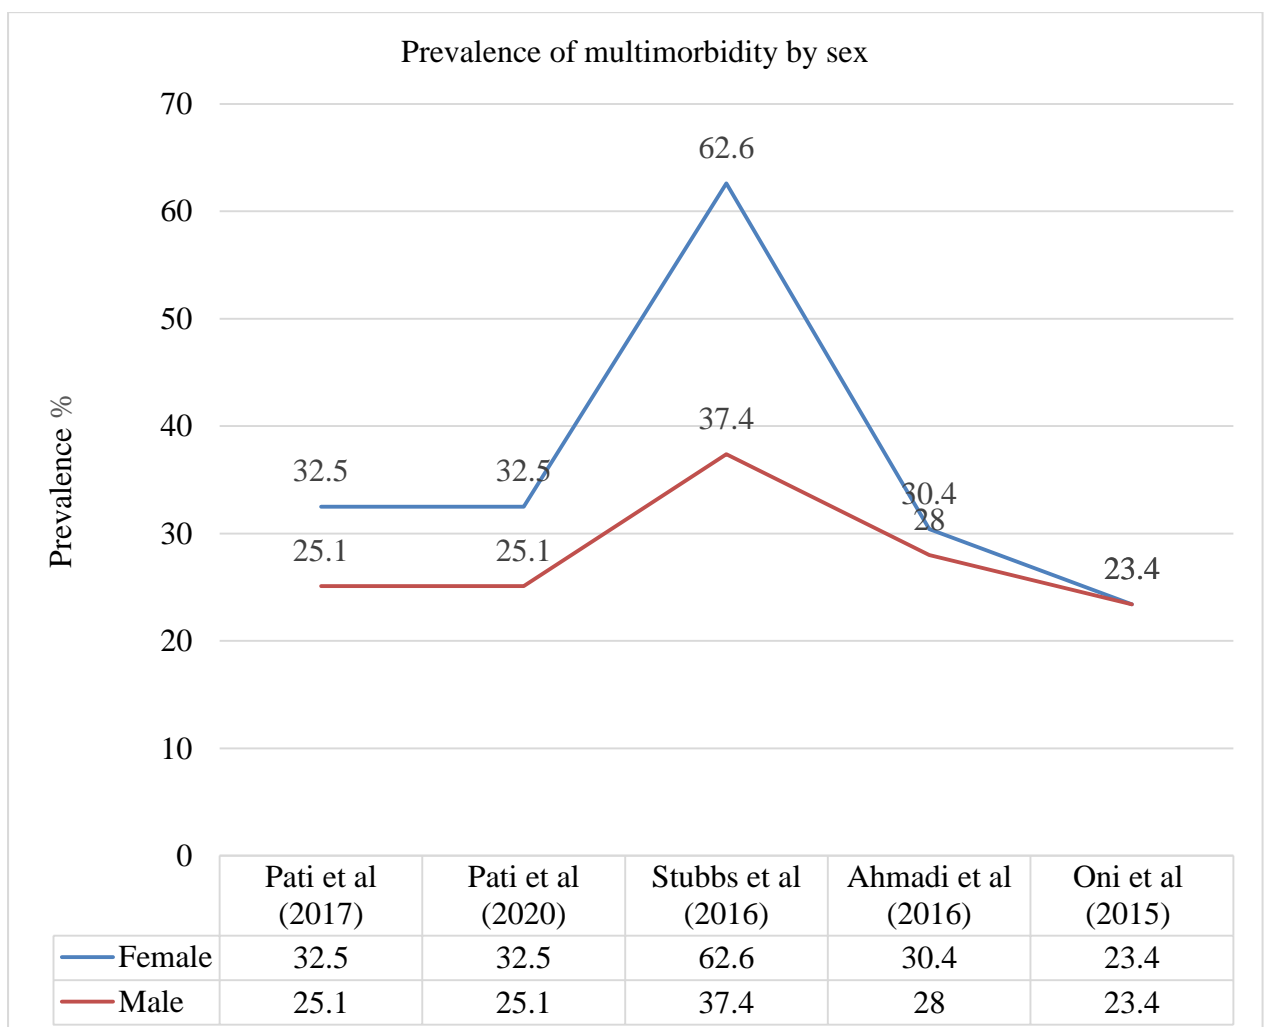

# MULTIMORBIDITY OF COMMUNICABLE AND NONCOMMUNICABLE DISEASES IN LOW- AND MIDDLE-INCOME COUNTRIES: A SYSTEMATIC REVIEW AND META-ANALYSIS

Combined search strategy-PubMed, Embase and Cochrane

## 1. PUBMED

|    |                     |                                                                                                                                                                                                                                                                                                                                                                                                                                                                                                                                                                                                                                                                                                                                                                                                                                                                                                                                                                                                                                                                                                                                                                                                                                                                                                                                                                                                                                                                                                                                                                                                                                                                                                                                                                                                                                                                                                                                                                                                                                                                                                                                                                                                                                                                                                                                                                                                                                                                                                                                                                                                                                                                                                                                                                                                                                                                                                                                                                                                                                                                                                                                                                                                                                                                                                                                                                                                                                                                                                                                                                                                                                                                                                                                                                                                                                                                                                                                                                                                                                                                                                                                                                                                                                                                                                                                                                                                                                                                                                                                                                                                                                                                                                                                                                                                                                                                                                                                                                                                                                                                                                                                                                                                                                                                                                                                 |                         |          |
|----|---------------------|---------------------------------------------------------------------------------------------------------------------------------------------------------------------------------------------------------------------------------------------------------------------------------------------------------------------------------------------------------------------------------------------------------------------------------------------------------------------------------------------------------------------------------------------------------------------------------------------------------------------------------------------------------------------------------------------------------------------------------------------------------------------------------------------------------------------------------------------------------------------------------------------------------------------------------------------------------------------------------------------------------------------------------------------------------------------------------------------------------------------------------------------------------------------------------------------------------------------------------------------------------------------------------------------------------------------------------------------------------------------------------------------------------------------------------------------------------------------------------------------------------------------------------------------------------------------------------------------------------------------------------------------------------------------------------------------------------------------------------------------------------------------------------------------------------------------------------------------------------------------------------------------------------------------------------------------------------------------------------------------------------------------------------------------------------------------------------------------------------------------------------------------------------------------------------------------------------------------------------------------------------------------------------------------------------------------------------------------------------------------------------------------------------------------------------------------------------------------------------------------------------------------------------------------------------------------------------------------------------------------------------------------------------------------------------------------------------------------------------------------------------------------------------------------------------------------------------------------------------------------------------------------------------------------------------------------------------------------------------------------------------------------------------------------------------------------------------------------------------------------------------------------------------------------------------------------------------------------------------------------------------------------------------------------------------------------------------------------------------------------------------------------------------------------------------------------------------------------------------------------------------------------------------------------------------------------------------------------------------------------------------------------------------------------------------------------------------------------------------------------------------------------------------------------------------------------------------------------------------------------------------------------------------------------------------------------------------------------------------------------------------------------------------------------------------------------------------------------------------------------------------------------------------------------------------------------------------------------------------------------------------------------------------------------------------------------------------------------------------------------------------------------------------------------------------------------------------------------------------------------------------------------------------------------------------------------------------------------------------------------------------------------------------------------------------------------------------------------------------------------------------------------------------------------------------------------------------------------------------------------------------------------------------------------------------------------------------------------------------------------------------------------------------------------------------------------------------------------------------------------------------------------------------------------------------------------------------------------------------------------------------------------------------------------------------------------------------|-------------------------|----------|
| #9 | <a href="#">Add</a> | Search ((#3 AND #4 AND #7 AND #8))                                                                                                                                                                                                                                                                                                                                                                                                                                                                                                                                                                                                                                                                                                                                                                                                                                                                                                                                                                                                                                                                                                                                                                                                                                                                                                                                                                                                                                                                                                                                                                                                                                                                                                                                                                                                                                                                                                                                                                                                                                                                                                                                                                                                                                                                                                                                                                                                                                                                                                                                                                                                                                                                                                                                                                                                                                                                                                                                                                                                                                                                                                                                                                                                                                                                                                                                                                                                                                                                                                                                                                                                                                                                                                                                                                                                                                                                                                                                                                                                                                                                                                                                                                                                                                                                                                                                                                                                                                                                                                                                                                                                                                                                                                                                                                                                                                                                                                                                                                                                                                                                                                                                                                                                                                                                                              | <a href="#">1917</a>    | 07:17:06 |
| #8 | <a href="#">Add</a> | Search ((Developing countries[MeSH terms]) OR developing countr*[Title/Abstract] OR developing nation*[Title/Abstract] OR developing population*[Title/Abstract] OR developing econom*[Title/Abstract] OR undeveloped countr*[Title/Abstract] OR undeveloped nation*[Title/Abstract] OR undeveloped econom*[Title/Abstract] OR least developed countr*[Title/Abstract] OR least developed nation*[Title/Abstract] OR least developed econom*[Title/Abstract] OR least developed population*[Title/Abstract] OR less-developed countr*[Title/Abstract] OR less-developed nation*[Title/Abstract] OR less-developed population*[Title/Abstract] OR less-developed econom*[Title/Abstract] OR lesser developed countr*[Title/Abstract] OR lesser developed nation*[Title/Abstract] OR lesser developed population*[Title/Abstract] OR lesser developed econom*[Title/Abstract] OR under-developed countr*[Title/Abstract] OR under-developed nation*[Title/Abstract] OR underdeveloped countr*[Title/Abstract] OR underdeveloped nation*[Title/Abstract] OR underdeveloped population*[Title/Abstract] OR underdeveloped econom*[Title/Abstract] OR low income countr*[Title/Abstract] OR middle income countr*[Title/Abstract] OR low income nation*[Title/Abstract] OR middle income nation*[Title/Abstract] OR low income population*[Title/Abstract] OR middle income population*[Title/Abstract] OR low income econom*[Title/Abstract] OR middle income econom*[Title/Abstract] OR lower income countr*[Title/Abstract] OR lower income nation*[Title/Abstract] OR lower income population*[Title/Abstract] OR lower income economy*[Title/Abstract] OR lower income econom*[Title/Abstract] OR resource limited*[Title/Abstract] OR low resource countr*[Title/Abstract] OR lower resource countr*[Title/Abstract] OR low resource nation*[Title/Abstract] OR low resource population*[Title/Abstract] OR low resource econom*[Title/Abstract] OR low resource countr*[Title/Abstract] OR underserved countr*[Title/Abstract] OR underserved nation*[Title/Abstract] OR underserved population*[Title/Abstract] OR underserved econom*[Title/Abstract] OR under-served countr*[Title/Abstract] OR under-served nation*[Title/Abstract] OR under-served population*[Title/Abstract] OR under-served econom*[Title/Abstract] OR deprived countr*[Title/Abstract] OR deprived nation*[Title/Abstract] OR deprived economy*[Title/Abstract] OR deprived econom*[Title/Abstract] OR deprived population*[Title/Abstract] OR poor countr*[Title/Abstract] OR poor nation*[Title/Abstract] OR poor population*[Title/Abstract] OR poor econom*[Title/Abstract] OR poor countr*[Title/Abstract] OR poorer countr*[Title/Abstract] OR poorer nation*[Title/Abstract] OR poorer population*[Title/Abstract] OR poorer econom*[Title/Abstract] OR lmic*[Title/Abstract] OR lmic*[Title/Abstract] OR transitional countr*[Title/Abstract] OR transitional nation*[Title/Abstract] OR transitional econom*[Title/Abstract] OR low resource setting*[Title/Abstract] OR lower resource setting*[Title/Abstract] OR middle resource setting*[Title/Abstract] OR Third world*[Title/Abstract] OR South east asia*[Title/Abstract] OR Middle east*[Title/Abstract] OR Afghanistan*[Title/Abstract] OR Albania*[Title/Abstract] OR Algeria*[Title/Abstract] OR American samoa*[Title/Abstract] OR Angola*[Title/Abstract] OR Angolese*[Title/Abstract] OR Angolian*[Title/Abstract] OR Argentina*[Title/Abstract] OR Armenia*[Title/Abstract] OR Azerbaijan*[Title/Abstract] OR Bangladesh*[Title/Abstract] OR Belarus*[Title/Abstract] OR Belize*[Title/Abstract] OR Benin*[Title/Abstract] OR Bhutan*[Title/Abstract] OR Bolivia*[Title/Abstract] OR (Bosnia[Title/Abstract] AND Herzegovina*[Title/Abstract]) OR Botswana*[Title/Abstract] OR Brazil*[Title/Abstract] OR Bulgaria*[Title/Abstract] OR Burma*[Title/Abstract] OR Burkina Faso*[Title/Abstract] OR Burundi*[Title/Abstract] OR Cabo Verde*[Title/Abstract] OR Cambodia*[Title/Abstract] OR Cameroon*[Title/Abstract] OR Central Africa Republic*[Title/Abstract] OR Chad*[Title/Abstract] OR Comoros*[Title/Abstract] OR Congo*[Title/Abstract] OR Cote d'Ivoire*[Title/Abstract] OR Cuba*[Title/Abstract] OR Djibouti*[Title/Abstract] OR Dominican Republic*[Title/Abstract] OR Ecuador*[Title/Abstract] OR East Africa*[Title/Abstract] OR Eastern Africa*[Title/Abstract] OR Egypt*[Title/Abstract] OR El Savador*[Title/Abstract] OR Equatorial Guinea*[Title/Abstract] OR Eritrea*[Title/Abstract] OR Eswatini*[Title/Abstract] OR Ethiopia*[Title/Abstract] OR Fiji*[Title/Abstract] OR Gabon*[Title/Abstract] OR The Gambia*[Title/Abstract] OR Georgia*[Title/Abstract] OR Ghana*[Title/Abstract] OR Grenada*[Title/Abstract] OR Guatemala*[Title/Abstract] OR Guinea*[Title/Abstract] OR Guinea Bissau*[Title/Abstract] OR Guyana*[Title/Abstract] OR Haiti*[Title/Abstract] OR India*[Title/Abstract] OR Indonesia*[Title/Abstract] OR Iran*[Title/Abstract] OR Iraq*[Title/Abstract] OR Jamaica*[Title/Abstract] OR Jordan*[Title/Abstract] OR Kazakhstan*[Title/Abstract] OR Kenya*[Title/Abstract] OR Kiribati*[Title/Abstract] OR Democratic People's Republic of Korea*[Title/Abstract] OR Kosovo*[Title/Abstract] OR Kyrgyz republic*[Title/Abstract] OR Lao | <a href="#">1629404</a> | 07:16:04 |

|    |                     |                                                                                                                                                                                                                                                                                                                                                                                                                                                                                                                                                                                                                                                                                                                                                                                                                                                                                                                                                                                                                                                                                                                                                                                                                                                                                                                                                                                                                                                                                                                                                                                                                                                                                                                                                                                                                                                                                                                                                                                                                                                                                                                                                                                                                                                                                                                                          |                         |          |
|----|---------------------|------------------------------------------------------------------------------------------------------------------------------------------------------------------------------------------------------------------------------------------------------------------------------------------------------------------------------------------------------------------------------------------------------------------------------------------------------------------------------------------------------------------------------------------------------------------------------------------------------------------------------------------------------------------------------------------------------------------------------------------------------------------------------------------------------------------------------------------------------------------------------------------------------------------------------------------------------------------------------------------------------------------------------------------------------------------------------------------------------------------------------------------------------------------------------------------------------------------------------------------------------------------------------------------------------------------------------------------------------------------------------------------------------------------------------------------------------------------------------------------------------------------------------------------------------------------------------------------------------------------------------------------------------------------------------------------------------------------------------------------------------------------------------------------------------------------------------------------------------------------------------------------------------------------------------------------------------------------------------------------------------------------------------------------------------------------------------------------------------------------------------------------------------------------------------------------------------------------------------------------------------------------------------------------------------------------------------------------|-------------------------|----------|
|    |                     | PDR[Title/Abstract] OR Lebanon*[Title/Abstract] OR Lesotho*[Title/Abstract] OR Liberia*[Title/Abstract] OR Libya*[Title/Abstract] OR Madagascar*[Title/Abstract] OR Malawi*[Title/Abstract] OR Malaysia*[Title/Abstract] OR Maldives*[Title/Abstract] OR Mali*[Title/Abstract] OR Marshall Islands*[Title/Abstract] OR Mauritania*[Title/Abstract] OR Mauritius*[Title/Abstract] OR Mexico*[Title/Abstract] OR Micronesia*[Title/Abstract] OR Moldova*[Title/Abstract] OR Mongolia*[Title/Abstract] OR Montenegro*[Title/Abstract] OR Morocco*[Title/Abstract] OR Mozambique*[Title/Abstract] OR Myanmar*[Title/Abstract] OR Namibia*[Title/Abstract] OR Nauru*[Title/Abstract] OR Nepal*[Title/Abstract] OR Nicaragua*[Title/Abstract] OR Niger*[Title/Abstract] OR Nigeria*[Title/Abstract] OR North Macedonia*[Title/Abstract] OR Pakistan*[Title/Abstract] OR Papua New Guinea*[Title/Abstract] OR Paraguay*[Title/Abstract] OR Peru*[Title/Abstract] OR Philippines*[Title/Abstract] OR Principe*[Title/Abstract] OR Romania*[Title/Abstract] OR Rhodesia*[Title/Abstract] OR Rwanda*[Title/Abstract] OR Samoa*[Title/Abstract] OR Sao tome*[Title/Abstract] OR Senegal*[Title/Abstract] OR Sierra Leone*[Title/Abstract] OR Solomon Islands*[Title/Abstract] OR Somalia*[Title/Abstract] OR South Africa*[Title/Abstract] OR Southern Africa*[Title/Abstract] OR South Sudan*[Title/Abstract] OR Sri Lanka*[Title/Abstract] OR Sudan*[Title/Abstract] OR Swaziland*[Title/Abstract] OR Syria*[Title/Abstract] OR Tajikistan*[Title/Abstract] OR Tanzania*[Title/Abstract] OR Togo*[Title/Abstract] OR Timor-Leste*[Title/Abstract] OR Togo*[Title/Abstract] OR Tonga*[Title/Abstract] OR Tunisia*[Title/Abstract] OR Tunis*[Title/Abstract] OR Uganda*[Title/Abstract] OR Uzbekistan*[Title/Abstract] OR Vanuatu*[Title/Abstract] OR Venezuela*[Title/Abstract] OR Vietnam*[Title/Abstract] OR West Bank[Title/Abstract] AND Gaza*[Title/Abstract] OR West Africa*[Title/Abstract] OR Yemen*[Title/Abstract] OR Zaire*[Title/Abstract] OR Zambia*[Title/Abstract] OR Zimbabwe*[Title/Abstract]))                                                                                                                                                                                                                                   |                         |          |
| #7 | <a href="#">Add</a> | Search ((Non-communicable diseases[MeSH Terms]) OR Non-communicable diseases*[Title/Abstract]) OR Noncommunicable disease*[Title/Abstract] OR Noninfectious disease*[Title/Abstract] OR Non infectious disease*[Title/Abstract] OR Non communicable chronic disease*[Title/Abstract] OR Noncommunicable chronic disease*[Title/Abstract] OR Cardiovascular diseases[MeSH Terms] OR Cardiovascular disease*[Title/Abstract] OR Heart disease*[Title/Abstract] OR Heart failure*[Title/Abstract] OR Coronary Infarction*[Title/Abstract] OR Cardiac Infarction*[Title/Abstract] OR Myocardial Infarction*[Title/Abstract] OR Lung diseases, obstructive[MeSH Terms] OR Chronic obstructive disease*[Title/Abstract] OR Asthma*[Title/Abstract] OR Emphysema*[Title/Abstract] OR Chronic obstructive pulmonary disease*[Title/Abstract] OR COPD*[Title/Abstract] OR Cystic Fibrosis*[Title/Abstract] OR Bronchitis*[Title/Abstract] OR Neoplasms[MeSH Terms] OR Neoplasm*[Title/Abstract] OR Cancer*[Title/Abstract] OR Cancers*[Title/Abstract] OR Tumor*[Title/Abstract] OR Tumors*[Title/Abstract] OR Tumour*[Title/Abstract] OR Malignancies*[Title/Abstract] OR Malignancy*[Title/Abstract] OR Malignant*[Title/Abstract] OR Malignant neoplasm*[Title/Abstract] OR Malignant tumour*[Title/Abstract] OR Diabetes mellitus[MeSH Terms] OR Diabetes*[Title/Abstract] OR Diabetic*[Title/Abstract] OR Polygenic disease*[Title/Abstract] OR Poligenic disorder*[Title/Abstract] OR Mental disorders[MeSH Terms] OR Mental disorders*[Title/Abstract] OR Mental disorder*[Title/Abstract] OR Depression*[Title/Abstract] OR Depressive disorders*[Title/Abstract] OR Personality disorders*[Title/Abstract] OR Hypertension[MeSH Terms] OR Hypertension[Title/Abstract] OR Hypertensive disorders*[Title/Abstract] OR Hypertensive*[Title/Abstract] OR High blood pressure*[Title/Abstract]))                                                                                                                                                                                                                                                                                                                                                                                                                                             | <a href="#">8522951</a> | 07:15:41 |
| #4 | <a href="#">Add</a> | Search ((Comorbidity[MeSH terms]) OR comorbidit*[Title/Abstract] OR polymorbidit*[Title/Abstract] OR multiple chronic[Title/Abstract] OR multiple chronic medical conditions*[Title/Abstract] OR multiple morbidit*[Title/Abstract] OR multiple chronic health conditions*[Title/Abstract] OR multimorbidit*[Title/Abstract] OR multi-morbidit*[Title/Abstract])                                                                                                                                                                                                                                                                                                                                                                                                                                                                                                                                                                                                                                                                                                                                                                                                                                                                                                                                                                                                                                                                                                                                                                                                                                                                                                                                                                                                                                                                                                                                                                                                                                                                                                                                                                                                                                                                                                                                                                         | <a href="#">196144</a>  | 07:01:00 |
| #3 | <a href="#">Add</a> | Search ((Communicable Diseases[MeSH Terms]) OR communicable disease*[Title/Abstract] OR communicable infection*[Title/Abstract] OR communicable chronic disease*[Title/Abstract] OR transmittable disease*[Title/Abstract] OR infectious disease*[Title/Abstract] OR transferrable disease*[Title/Abstract] OR contaminating disease*[Title/Abstract] OR virulent disease*[Title/Abstract] OR infective disease*[Title/Abstract] OR contagious disease*[Title/Abstract] OR HIV/AIDS[MeSH Terms] OR hiv*[Title/Abstract] OR aids*[Title/Abstract] OR wasting disease*[Title/Abstract] OR immunodeficiency virus*[Title/Abstract] OR immunodeficiency virus* OR wasting syndrome*[Title/Abstract] OR virulent disease*[Title/Abstract] OR transmissible disease*[Title/Abstract] OR transmissible infection*[Title/Abstract] OR Tuberculosis[MeSH Terms] OR tuberculos*[Title/Abstract] OR tuberculosis infection*[Title/Abstract] OR TB[Title/Abstract] OR T.B.[Title/Abstract] OR consumption*[Title/Abstract] OR white plague*[Title/Abstract] OR pott's disease*[Title/Abstract] OR bacilli infection*[Title/Abstract] OR pneumonia*[Title/Abstract] OR phthisis*[Title/Abstract] OR phthisic*[Title/Abstract] OR co-infection*[Title/Abstract] OR Malaria[MeSH Terms] OR malaria[Title/Abstract] OR plasmodium infection*[Title/Abstract] OR ectoparasitic infection*[Title/Abstract] OR ectoparasite*[Title/Abstract] OR Hepatitis[MeSH Terms] OR hepatitis[Title/Abstract] OR liver disease*[Title/Abstract] OR liver infection*[Title/Abstract] OR infectious disease*[Title/Abstract] OR hepatitis delta*[Title/Abstract] OR delta hepatitis*[Title/Abstract] OR hepatitis virus*[Title/Abstract] OR Hepatitis B[MeSH Terms] OR hepatitis b*[Title/Abstract] OR infectious hepatitis b*[Title/Abstract] OR serum hepatitis*[Title/Abstract] OR acute hepatitis b*[Title/Abstract] OR acute serum hepatitis*[Title/Abstract] OR Hepatitis C[MeSH Terms] OR hepatitis c*[Title/Abstract] OR Peptic Ulcer Disease[MeSH Terms] OR peptic ulcer disease*[Title/Abstract] OR peptic ulcer*[Title/Abstract] OR peptic ulceration*[Title/Abstract] OR active peptic ulceration*[Title/Abstract] OR gastric ulcer*[Title/Abstract] OR gastritis*[Title/Abstract] OR gastric infection*[Title/Abstract] OR gastric disease*[Title/Abstract] | <a href="#">1701644</a> | 06:57:34 |

|  |                                                                                                                                                                                                                       |  |  |
|--|-----------------------------------------------------------------------------------------------------------------------------------------------------------------------------------------------------------------------|--|--|
|  | OR duodenal ulcer*[Title/Abstract] OR duodenal infection*[Title/Abstract] OR duodenal disease*[Title/Abstract] OR ulcers*[Title/Abstract] OR pyloric infection*[Title/Abstract] OR pyloric disease*[Title/Abstract])) |  |  |
|--|-----------------------------------------------------------------------------------------------------------------------------------------------------------------------------------------------------------------------|--|--|

## 2. EMBASE

Embase Session Results (24 Feb 2020)

| No. | Query                                                                                                                                                                                                                                                                                                                                                                                                                                                                                                                                                                                                                                                                                                                                                                                                                                                                                                                                                                                                                                                                                                                                                                                                                                                                                                                                                                                                                                                                                                                                                                                                                                                                                                                                                                                                                 | Results        |
|-----|-----------------------------------------------------------------------------------------------------------------------------------------------------------------------------------------------------------------------------------------------------------------------------------------------------------------------------------------------------------------------------------------------------------------------------------------------------------------------------------------------------------------------------------------------------------------------------------------------------------------------------------------------------------------------------------------------------------------------------------------------------------------------------------------------------------------------------------------------------------------------------------------------------------------------------------------------------------------------------------------------------------------------------------------------------------------------------------------------------------------------------------------------------------------------------------------------------------------------------------------------------------------------------------------------------------------------------------------------------------------------------------------------------------------------------------------------------------------------------------------------------------------------------------------------------------------------------------------------------------------------------------------------------------------------------------------------------------------------------------------------------------------------------------------------------------------------|----------------|
| #7  | #6 AND [embase]/lim                                                                                                                                                                                                                                                                                                                                                                                                                                                                                                                                                                                                                                                                                                                                                                                                                                                                                                                                                                                                                                                                                                                                                                                                                                                                                                                                                                                                                                                                                                                                                                                                                                                                                                                                                                                                   | <b>2173</b>    |
| #6  | #1 AND #2 AND #3 AND #4                                                                                                                                                                                                                                                                                                                                                                                                                                                                                                                                                                                                                                                                                                                                                                                                                                                                                                                                                                                                                                                                                                                                                                                                                                                                                                                                                                                                                                                                                                                                                                                                                                                                                                                                                                                               | <b>2383</b>    |
| #4  | 'comorbidity'/exp OR cormobidit*:ab,ti OR polymorbidit*:ab,ti OR 'multiple chronic*':ab,ti OR 'multiple chronic medical condition*':ab,ti OR 'multiple morbidit*':ab,ti OR 'multiple chronic health condition*':ab,ti OR multimorbidit*:ab,ti OR 'multi morbidit*':ab,ti                                                                                                                                                                                                                                                                                                                                                                                                                                                                                                                                                                                                                                                                                                                                                                                                                                                                                                                                                                                                                                                                                                                                                                                                                                                                                                                                                                                                                                                                                                                                              | <b>262018</b>  |
| #3  | ('developing country'/exp/mj OR 'developing countr*':ab,ti OR 'developing nation*':ab,ti OR 'developing population*':ab,ti OR 'developing econom*':ab,ti OR 'undeveloped countr*':ab,ti OR 'undeveloped nation*':ab,ti OR 'undeveloped econom*':ab,ti OR 'least developed countr*':ab,ti OR 'least developed nation*':ab,ti OR 'least developed econom*':ab,ti OR 'less-developed countr*':ab,ti OR 'less-developed nation*':ab,ti OR 'less-developed population*':ab,ti OR 'less-developed econom*':ab,ti OR 'lesser developed countr*':ab,ti OR 'lesser developed nation*':ab,ti OR 'lessr developed econom*':ab,ti OR 'under-developed countr*':ab,ti OR 'under-developed econom*':ab,ti OR 'under-developed nation*':ab,ti OR 'underdeveloped countr*':ab,ti OR 'underdeveloped nation*':ab,ti OR 'underdeveloped population*':ab,ti OR 'underdeveloped econom*':ab,ti OR 'low income countr*':ab,ti OR 'middle income countr*':ab,ti OR 'low income nation*':ab,ti OR 'middle income nation*':ab,ti OR 'low income population*':ab,ti OR 'middle income population*':ab,ti OR 'low income econom*':ab,ti OR 'middle income econom*':ab,ti OR 'lower income countr*':ab,ti OR 'lower income nation*':ab,ti OR 'lower income population*':ab,ti OR 'lower income econom*':ab,ti OR 'resource limited*':ab,ti OR 'low resource countr*':ab,ti OR 'low resource nation*':ab,ti OR 'low resource population*':ab,ti OR 'low resource econom*':ab,ti OR 'underserved countr*':ab,ti OR 'underserved nation*':ab,ti OR 'underserved population*':ab,ti OR 'underserved econom*':ab,ti OR 'under-served countr*':ab,ti OR 'under-served nation*':ab,ti OR 'under-served populations*':ab,ti OR 'under-served econom*':ab,ti OR 'under-served economies':ab,ti OR 'deprived countr*':ab,ti OR 'deprived nation*':ab,ti OR | <b>1580542</b> |

'deprived nations\*':ab,ti OR 'deprived economies\*':ab,ti OR 'deprived population\*':ab,ti OR 'poor country\*':ab,ti OR 'poor nation\*':ab,ti OR 'poor population\*':ab,ti OR 'poor economy\*':ab,ti OR 'poor countries\*':ab,ti OR 'poorer countr\*':ab,ti OR 'poorer nation\*':ab,ti OR 'poorer population\*':ab,ti OR 'poorer econom\*':ab,ti OR lmic\*':ab,ti OR lmic\*':ab,ti OR 'transitional countr\*':ab,ti OR 'transitional nations\*':ab,ti OR 'transitional economies\*':ab,ti OR 'low resource setting\*':ab,ti OR 'lower resource setting\*':ab,ti OR 'middle resource setting\*':ab,ti OR 'third world\*':ab,ti OR 'south east asia\*':ab,ti OR 'middle east\*':ab,ti OR afghanistan\*':ab,ti OR albania\*':ab,ti OR algeria\*':ab,ti OR 'american samoa\*':ab,ti OR angola\*':ab,ti OR angolese\*':ab,ti OR angolian\*':ab,ti OR argentina\*':ab,ti OR armenia\*':ab,ti OR azerbaijan\*':ab,ti OR bangladesh\*':ab,ti OR belarus\*':ab,ti OR belize\*':ab,ti OR benin\*':ab,ti OR bhutan\*':ab,ti OR bolivia\*':ab,ti OR bosnia\*':ab,ti OR herzegovina\*':ab,ti OR botswana\*':ab,ti OR brazil\*':ab,ti OR bulgaria\*':ab,ti OR burma\*':ab,ti OR 'burkina faso\*':ab,ti OR burundi\*':ab,ti OR 'cabo verde\*':ab,ti OR cambodia\*':ab,ti OR cameroon\*':ab,ti OR 'central africa republic\*':ab,ti OR chad\*':ab,ti OR comoros\*':ab,ti OR congo\*':ab,ti OR 'cote d`ivoire\*':ab,ti OR cuba\*':ab,ti OR djibouti\*':ab,ti OR 'dominican republic\*':ab,ti OR eucador\*':ab,ti OR 'east africa\*':ab,ti OR 'eastern africa\*':ab,ti OR egypt\*':ab,ti OR 'el savador\*':ab,ti OR 'equatorial guinea\*':ab,ti OR eritrea\*':ab,ti OR eswatini\*':ab,ti OR ethiopia\*':ab,ti OR fiji\*':ab,ti OR gabon\*':ab,ti OR 'the gambia\*':ab,ti OR georgia\*':ab,ti OR ghana\*':ab,ti OR grenada\*':ab,ti OR guatemala\*':ab,ti OR guinea\*':ab,ti OR 'guinea bissau\*':ab,ti OR guyana\*':ab,ti OR haiti\*':ab,ti OR india\*':ab,ti OR indonesia\*':ab,ti OR iran\*':ab,ti OR iraq\*':ab,ti OR jamaica\*':ab,ti OR jordan\*':ab,ti OR kazakhstan\*':ab,ti OR kenya\*':ab,ti OR kiribati\*':ab,ti OR 'democratic peoples republic of korea\*':ab,ti OR kosovo\*':ab,ti OR 'kyrgyz republic\*':ab,ti OR 'lao pdr\*':ab,ti OR lebanon\*':ab,ti OR lesotho\*':ab,ti OR liberia\*':ab,ti OR libya\*':ab,ti OR madagascar\*':ab,ti OR malawi\*':ab,ti OR malaysia\*':ab,ti OR maldives\*':ab,ti OR mali\*':ab,ti OR 'marshall islands\*':ab,ti OR mauritania\*':ab,ti OR mauritius\*':ab,ti OR mexico\*':ab,ti OR micronesia\*':ab,ti OR moldova\*':ab,ti OR mongolia\*':ab,ti OR montenegro\*':ab,ti OR morocco\*':ab,ti OR mozambique\*':ab,ti OR myanmar\*':ab,ti OR namibia\*':ab,ti OR nauru\*':ab,ti OR nepal\*':ab,ti OR nicaragua\*':ab,ti OR niger\*':ab,ti OR nigeria\*':ab,ti OR 'north macedonia\*':ab,ti OR pakistan\*':ab,ti OR 'papua new guinea\*':ab,ti OR paraguay\*':ab,ti OR peru\*':ab,ti OR phillipines\*':ab,ti OR principe\*':ab,ti OR romania\*':ab,ti OR rhodesia\*':ab,ti OR rwanada\*':ab,ti OR samoa\*':ab,ti OR 'sao tome\*':ab,ti OR senegal\*':ab,ti OR 'sierra leone\*':ab,ti OR 'solomon islands\*':ab,ti OR somalia\*':ab,ti OR 'south africa\*':ab,ti OR 'southern africa\*':ab,ti OR 'south sudan\*':ab,ti OR 'sri lanka\*':ab,ti OR sudan\*':ab,ti OR

| No. | Query | Results |
|-----|-------|---------|
|-----|-------|---------|

swaziland\*:ab,ti OR syria\*:ab,ti OR tajikistan\*:ab,ti OR tanzania\*:ab,ti OR togo\*:ab,ti OR tonga\*:ab,ti OR tunisia\*:ab,ti OR tunis\*:ab,ti OR uganda\*:ab,ti OR uzbekistan\*:ab,ti OR vanuata\*:ab,ti OR venezuela\*:ab,ti OR vietnam\*:ab,ti OR 'west bank':ab,ti OR gaza\*:ab,ti OR 'west africa\*':ab,ti OR yemen\*:ab,ti OR zaire\*:ab,ti OR zambia\*:ab,ti OR zimbabwe\*:ab,ti) AND [2000-2020]/py

('communicable disease'/exp/mj OR 'communicable diseases':ab,ti OR 'communicable infection\*':ab,ti OR 'communicable chronic disease\*':ab,ti OR 'transmittable disease\*':ab,ti OR 'transferrable disease\*':ab,ti OR 'contaminating disease\*':ab,ti OR 'infective disease\*':ab,ti OR 'contagious disease\*':ab,ti OR 'hiv/aids' OR hiv:ab,ti OR aids:ab,ti OR 'wasting disease\*':ab,ti OR 'wasting syndrome':ab,ti OR 'immunodeficiency virus\*':ab,ti OR 'virulent disease\*':ab,ti OR 'transmissible disease\*':ab,ti OR 'transmissible infection\*':ab,ti OR 'tuberculosis'/exp/mj OR tuberculos\*:ab,ti OR 'tuberculosis infection\*':ab,ti OR tb:ab,ti OR t.b.:ab,ti OR consumption\*:ab,ti OR 'white plague\*':ab,ti OR 'potts disease\*':ab,ti OR 'bacilli infection\*':ab,ti OR pneumonia\*:ab,ti OR phthisis\*:ab,ti OR phthisic\*:ab,ti OR 'co infection\*':ab,ti OR 'mixed infection\*':ab,ti OR 'malaria'/exp/mj OR malaria\*:ab,ti OR 'plasmodium infection\*':ab,ti OR 'ectoparasitic infection\*':ab,ti OR ectoparasite\*:ab,ti OR 'hepatitis'/exp/mj OR hepatitis:ab,ti OR 'liver disease\*':ab,ti OR 'liver infection\*':ab,ti OR 'infectious disease\*':ab,ti OR 'hepatitis delta\*':ab,ti OR 'delta hepatitis\*':ab,ti OR 'hepatitis virus\*':ab,ti OR 'hepatitis b'/exp/mj OR 'hepatitis b\*':ab,ti OR 'infectious hepatitis b\*':ab,ti OR 'serum hepatitis\*':ab,ti OR 'acute hepatitis b\*':ab,ti OR 'acute serum hepatitis\*':ab,ti OR 'hepatitis c'/exp/mj OR 'hepatitis c\*':ab,ti OR 'peptic ulcer disease'/exp/mj OR 'peptic ulcer disease\*':ab,ti OR 'peptic ulcer\*':ab,ti OR 'peptic ulceration\*':ab,ti OR 'active peptic ulceration\*':ab,ti OR 'gastric ulcer\*':ab,ti OR gastritis\*:ab,ti OR 'gastric infection\*':ab,ti OR 'gastric disease\*':ab,ti OR 'duodenal ulcer\*':ab,ti OR 'duodenal infection\*':ab,ti OR 'duodenal disease\*':ab,ti OR ulcers\*:ab,ti OR 'pyloric infection\*':ab,ti OR 'pyloric disease\*':ab,ti) AND [2000-2020]/py

|    |  |                |
|----|--|----------------|
| #2 |  | <b>1456312</b> |
|----|--|----------------|

('non communicable disease'/exp/mj OR 'non-communicable diseases\*':ab,ti OR 'noncommunicable disease\*':ab,ti OR 'noninfectious disease\*':ab,ti OR 'non infectious disease\*':ab,ti OR 'non commmunicable chronic disease\*':ab,ti OR 'noncommunicable chronic disease\*':ab,ti OR 'cardiovascular disease'/exp/mj OR 'cardiovascular disease\*':ab,ti OR 'heart disease\*':ab,ti OR 'heart failure\*':ab,ti OR 'coronary infarction\*':ab,ti OR 'cardiac infarction\*':ab,ti OR 'heart infarction\*':ab,ti OR 'myocardial infarction\*':ab,ti OR 'lung disease, obstructive' OR 'chronic obstructive

|    |  |                |
|----|--|----------------|
| #1 |  | <b>7247401</b> |
|----|--|----------------|

No. Query

Results

disease\*:ab,ti OR asthma\*:ab,ti OR emphysema\*:ab,ti OR 'chronic obstructive pulmonary disease':ab,ti OR copd\*:ab,ti OR 'cystic fibrosis':ab,ti OR bronchitis:ab,ti OR 'neoplasms'/exp/mj OR neoplasm\*:ab,ti OR cancer\*:ab,ti OR cancers\*:ab,ti OR tumor\*:ab,ti OR tumour\*:ab,ti OR malignancy\*:ab,ti OR malignant\*:ab,ti OR 'malignant neoplasm\*':ab,ti OR 'malignant tumour\*':ab,ti OR 'diabetes mellitus'/exp/mj OR diabetes\*:ab,ti OR diabetic\*:ab,ti OR 'polygenic disease\*':ab,ti OR 'polygenic disorder\*':ab,ti OR 'mental disorders'/exp/mj OR 'mental disorders\*':ab,ti OR 'mental disorder\*':ab,ti OR depression\*:ab,ti OR 'depressive disorders\*':ab,ti OR 'personality disorder\*':ab,ti OR 'hypertension'/exp/mj OR hypertension:ab,ti OR 'hypertensive disorder\*':ab,ti OR hypertensive\*:ab,ti OR 'high blood pressure\*':ab,ti) AND [2000-2020]/py

### 3. COCHRANE

Search Name: Combined search with publication dates applied

Date Run: 24/02/2020 16:45:17

Comment:

ID Search Hits

#1 (\*Noncommunicable Diseases\*) OR (Non-communicable disease\*):ti,ab OR (Noncommunicable Disease\*):ti,ab OR (Noninfectious Disease\*):ti,ab OR (Non-infectious Disease\*):ti,ab OR (non-communicable chronic disease\*):ti,ab OR (noncommunicable-chronic disease\*):ti,ab OR (Cardiovascular Diseases\*):ti,ab OR (cardiovascular disease\*):ti,ab OR (Lung Diseases, Obstructive\*):ti,ab OR (Lung Diseases\*):ti,ab OR (chronic obstructive\*):ti,ab OR (asthma\*):ti,ab OR (emphysema):ti,ab OR (COPD\*):ti,ab OR (CF\*):ti,ab OR (cystic fibrosis\*):ti,ab OR (bronchitis\*):ti,ab OR (Neoplasms\*):ti,ab OR (neoplasm\*):ti,ab OR (neoplasms\*):ti,ab OR (cancer\*):ti,ab OR (cancers\*):ti,ab OR (tumor\*):ti,ab OR (tumors\*):ti,ab OR (tumour\*):ti,ab OR (tumours\*):ti,ab OR (malignant\*):ti,ab OR (malignancy\*):ti,ab OR (malignancies\*):ti,ab OR (Diabetes Mellitus\*):ti,ab OR (diabetes\*):ti,ab OR (diabetic\*):ti,ab OR (Mental Disorder\*):ti,ab OR (Mental disorders\*):ti,ab OR (Mental Disorder\*):ti,ab OR (Hypertension\*):ti,ab OR (Hypertension\*):ti,ab  
390200

#2 (\*Comorbidity\*) OR (comorbidity\*):ti,ab OR (comorbidit\*):ti,ab OR (polymorbidit\*):ti,ab OR (\*Multiple Chronic\*) OR (multiple chronic medical conditions\*):ti,ab OR (multiple morbidit\*):ti,ab OR (multiple chronic health condition\*):ti,ab OR (multimorbidit\*):ti,ab OR (multi-morbidit\*):ti,ab  
32821



#3 (\*Communicable disease\*) OR (communicable diseases\*):ti,ab OR (communicable infection\*):ti,ab OR (communicable chronic disease\*):ti,ab OR (transmittable disease\*):ti,ab OR (transferrable disease\*):ti,ab OR (contaminating disease\*):ti,ab OR (infective disease\*):ti,ab OR (contagious disease\*):ti,ab OR (hiv\*):ti,ab OR (hiv\*):ti,ab OR (aids\*):ti,ab OR (wasting disease\*):ti,ab OR (wasting syndrome\*):ti,ab OR (immunodeficiency virus\*):ti,ab OR (virulent disease\*):ti,ab OR (transmissible disease\*):ti,ab OR (transmissible infection\*):ti,ab OR (Tuberculosis\*):ti,ab OR (tuberculos\*):ti,ab OR (tuberculosis infection\*):ti,ab OR (tb\*):ti,ab OR (t.b.\*):ti,ab OR (consumption\*):ti,ab OR (white plague\*):ti,ab OR (potts disease\*):ti,ab OR (bacilli infection\*):ti,ab OR (pneumonia\*):ti,ab OR (phthisis\*):ti,ab OR (phthisic\*):ti,ab OR (co-infection\*):ti,ab OR (mixed infection\*):ti,ab OR (Malaria\*):ti,ab OR (malaria\*):ti,ab OR (plasmodium infection\*):ti,ab OR (ectoparasitic infection\*):ti,ab OR (ectoparasite\*):ti,ab OR (hepatitis\*):ti,ab OR (liver disease\*):ti,ab OR (liver infection\*):ti,ab OR (infectious disease\*):ti,ab OR (hepatitis delta\*):ti,ab OR (delta hepatitis\*):ti,ab OR (hepatitis virus\*):ti,ab OR (hepatitis b\*):ti,ab OR (hepatitis b\*):ti,ab OR (infectious hepatitis b\*):ti,ab OR (serum hepatitis\*):ti,ab OR (acute hepatitis b\*):ti,ab OR (acute serum hepatitis\*):ti,ab OR (hepatitis c\*):ti,ab OR (hepatitis c\*):ti,ab OR (peptic ulcer disease\*):ti,ab OR (peptic ulcer disease\*):ti,ab OR (peptic ulcer\*):ti,ab OR (peptic ulceration\*):ti,ab OR (active peptic ulceration\*):ti,ab OR (gastric ulcer \*):ti,ab OR (gastritis\*):ti,ab OR (gastric infection\*):ti,ab OR (gastric disease\*):ti,ab OR (duodenal ulcer\*):ti,ab OR (duodenal infection\*):ti,ab OR (duodenal disease\*):ti,ab OR (ulcers\*):ti,ab OR (pyloric infection\*):ti,ab OR (pyloric disease\*):ti,ab 155376

#4 (\*Developing Countries OR (developing countr\*):ti,ab OR (developing nation\*):ti,ab OR (developing population\*):ti,ab OR (developing econom\*):ti,ab OR (undeveloped countr\*):ti,ab OR (undeveloped nation\*):ti,ab OR (undeveloped econom\*):ti,ab OR (least developed countr\*):ti,ab OR (least developed nation\*):ti,ab OR (least developed econom\*):ti,ab OR (least developed population\*):ti,ab OR (less developed countr\*):ti,ab OR (less developed nation\*):ti,ab OR (less developed population\*):ti,ab OR (less developed econom\*):ti,ab OR (lesser developed countr\*):ti,ab OR (lesser developed nation\*):ti,ab OR (lesser developed population\*):ti,ab OR (lesser developed econom\*):ti,ab OR (under developed countr\*):ti,ab OR (under developed nation\*):ti,ab OR (under developed population\*):ti,ab OR (under developed econom\*):ti,ab OR (low income countr\*):ti,ab OR (middle income countr\*):ti,ab OR (low income nation\*):ti,ab OR (middle income nation\*):ti,ab OR (low income population\*):ti,ab OR (middle income population\*):ti,ab OR (low income econom\*):ti,ab OR (middle income econom\*):ti,ab OR (lower income countr\*):ti,ab OR (lower income nation\*):ti,ab OR (lower income population\*):ti,ab OR (lower income econom\*):ti,ab OR (lower income econom\*):ti,ab OR (resource limited\*):ti,ab OR low resource countr\*):ti,ab OR (lower resource countr\*):ti,ab OR (low resource nation\*):ti,ab OR (low resource population\*):ti,ab OR (low resource econom\*):ti,ab OR (low resource econom\*):ti,ab OR (underserved countr\*):ti,ab OR (underserved nation\*):ti,ab OR (underserved population\*):ti,ab OR (underserved econom\*):ti,ab OR (under served countr\*):ti,ab OR (under served population\*):ti,ab OR (under served nation\*):ti,ab OR (derived countr\*):ti,ab OR (deprived nation\*):ti,ab OR (deprived nation\*):ti,ab OR (derived population\*):ti,ab OR (deprived econom\*):ti,ab OR (poor countr\*):ti,ab OR (poor nation\*):ti,ab OR (poor population\*):ti,ab OR (poor econom\*):ti,ab OR (poorer countr\*):ti,ab OR (poorer nation\*):ti,ab OR (poorer population\*):ti,ab OR (poorer econom\*):ti,ab OR (Imic\*):ti,ab OR (Imics\*):ti,ab OR (transitional countr\*):ti,ab OR (transitional nation\*):ti,ab OR (transitional econom\*):ti,ab OR (transition countr\*):ti,ab OR (transition nation\*):ti,ab OR (transition econom\*):ti,ab OR (low resource setting\*):ti,ab OR (lower

resource setting\*):ti,ab OR (middle resource setting\*):ti,ab OR (Third world\*):ti,ab OR (South East Asia\*):ti,ab OR (Middle east\*):ti,ab OR (Afghan\*):ti,ab OR (Angola\*):ti,ab OR (Angolese\*):ti,ab OR (Angolian\*):ti,ab OR (Armenia\*):ti,ab OR (Albania\*):ti,ab OR (Algeria\*):ti,ab OR (Bangladesh\*):ti,ab OR (Benin\*):ti,ab OR (Bhutan\*):ti,ab OR (Birma\*):ti,ab OR (Burma\*):ti,ab OR (Birmese\*):ti,ab OR (Burmese\*):ti,ab OR (Bolivia\*):ti,ab OR (Botswana\*):ti,ab OR (Burkina Faso\*):ti,ab OR (Burundi\*):ti,ab OR (Cabo Verde\*):ti,ab OR (Cambodia\*):ti,ab OR (Cameroon\*):ti,ab OR (Central Africa\*):ti,ab OR (Chad\*):ti,ab OR (Comoros\*):ti,ab OR (Congo\*):ti,ab OR (Cote dlvoire\*):ti,ab OR (Djibouti\*):ti,ab OR (East Africa\*):ti,ab OR (Eastern Africa\*):ti,ab OR (Egypt\*):ti,ab OR (El Salvador\*):ti,ab OR (Equatorial Guinea\*):ti,ab OR (Eritrea\*):ti,ab OR (Ethiopia\*):ti,ab OR (Gabon\*):ti,ab OR (Gambia\*):ti,ab OR (Gaza\*):ti,ab OR (Georgia Republic\*):ti,ab OR (Grenada\*):ti,ab OR (Ghana\*):ti,ab OR (Guatemala\*):ti,ab OR (Guinea\*):ti,ab OR (Haiti\*):ti,ab OR (India\*):ti,ab OR (Indonesia\*):ti,ab OR (Ivory Coast\*):ti,ab OR (Kenya\*):ti,ab OR (Kiribati\*):ti,ab OR (Kosovo\*):ti,ab OR (Kyrgyz republic\*):ti,ab OR (Lao PDR\*):ti,ab OR (Laos\*):ti,ab OR (Lesotho\*):ti,ab OR (Liberia\*):ti,ab OR (Madagascar\*):ti,ab OR (Malawi\*):ti,ab OR (Mali\*):ti,ab OR (Mauritania\*):ti,ab OR (Mauritia\*):ti,ab OR (Micronesia\*):ti,ab OR (Mozambique\*):ti,ab OR (Moldovo\*):ti,ab OR (Mongolia\*):ti,ab OR (Morocco\*):ti,ab OR (Mozambique\*):ti,ab OR (Myanmar\*):ti,ab OR (Namibia\*):ti,ab OR (Nepal\*):ti,ab OR (Nicaragua\*):ti,ab OR (Niger\*):ti,ab OR (North Korea\*):ti,ab OR (Northern Korea\*):ti,ab OR (Democratic Peoples Republic of Korea\*):ti,ab OR (Pakistan\*):ti,ab OR (Papua New Guinea\*):ti,ab OR (Philippine\*):ti,ab OR (Principe\*):ti,ab OR (Rhodesia\*):ti,ab OR (Rwanda\*):ti,ab OR (Samoa\*):ti,ab OR (Sao Tome\*):ti,ab OR (Senegal\*):ti,ab OR (Sierra Leone\*):ti,ab OR (Solomon Islands\*):ti,ab OR (Somalia\*):ti,ab OR (South Africa\*):ti,ab OR (South Sudan\*):ti,ab OR (Southern Africa\*):ti,ab OR (Sri Lanka\*):ti,ab OR (Sub Saharan Africa\*):ti,ab OR (Sudan\*):ti,ab OR (Swaziland\*):ti,ab OR (Syria\*):ti,ab OR (Tajikistan\*):ti,ab OR (Tanzania\*):ti,ab OR (Timor\*):ti,ab OR (Togo\*):ti,ab OR (Tonga\*):ti,ab OR (Tunis\*):ti,ab OR (Uganda\*):ti,ab OR (Ukraine\*):ti,ab OR (Uzbekistan\*):ti,ab OR (Vanuatu\*):ti,ab OR (Venezuela\*):ti,ab OR (Vietnam\*):ti,ab OR (West Africa\*):ti,ab OR (West Bank\*):ti,ab OR (Western Africa\*):ti,ab OR (Yemen\*):ti,ab OR (Zaire\*):ti,ab OR (Zambia\*):ti,ab OR (Zimbabwe\*):ti,ab

90632#5 #1 AND #2 AND #3 AND #4 with  
Cochrane Library publication date Between Jan 2000 and Jan 2020 611

| Section and Topic    | Item # | Checklist item                                                                                              |
|----------------------|--------|-------------------------------------------------------------------------------------------------------------|
| <b>TITLE</b>         |        |                                                                                                             |
| Title                | 1      | Identify the report as a systematic review.                                                                 |
| <b>ABSTRACT</b>      |        |                                                                                                             |
| Abstract             | 2      | See the PRISMA 2020 for Abstracts checklist.                                                                |
| <b>INTRODUCTION</b>  |        |                                                                                                             |
| Rationale            | 3      | Describe the rationale for the review in the context of existing knowledge.                                 |
| Objectives           | 4      | Provide an explicit statement of the objective(s) or question(s) the review addresses.                      |
| <b>METHODS</b>       |        |                                                                                                             |
| Eligibility criteria | 5      | Specify the inclusion and exclusion criteria for the review and how studies were grouped for the synthesis. |

| Section and Topic             | Item # | Checklist item                                                                                                                                                                                                                                                       |
|-------------------------------|--------|----------------------------------------------------------------------------------------------------------------------------------------------------------------------------------------------------------------------------------------------------------------------|
| Information sources           | 6      | Specify all databases, registers, websites, organisations, reference lists and other sources searched or the date when each source was last searched or consulted.                                                                                                   |
| Search strategy               | 7      | Present the full search strategies for all databases, registers and websites, including any filters and limits.                                                                                                                                                      |
| Selection process             | 8      | Specify the methods used to decide whether a study met the inclusion criteria of the review, including how many records and each report retrieved, whether they worked independently, and if applicable, details of automation.                                      |
| Data collection process       | 9      | Specify the methods used to collect data from reports, including how many reviewers collected data from each report independently, any processes for obtaining or confirming data from study investigators, and if applicable, details of the process.               |
| Data items                    | 10a    | List and define all outcomes for which data were sought. Specify whether all results that were compatible with the study were sought (e.g. for all measures, time points, analyses), and if not, the methods used to decide which results were included.             |
|                               | 10b    | List and define all other variables for which data were sought (e.g. participant and intervention characteristics), and any assumptions made about any missing or unclear information.                                                                               |
| Study risk of bias assessment | 11     | Specify the methods used to assess risk of bias in the included studies, including details of the tool(s) used for each study and whether they worked independently, and if applicable, details of automation tools used in the process.                             |
| Effect measures               | 12     | Specify for each outcome the effect measure(s) (e.g. risk ratio, mean difference) used in the synthesis of results.                                                                                                                                                  |
| Synthesis methods             | 13a    | Describe the processes used to decide which studies were eligible for each synthesis (e.g. tabulating the characteristics of each study and comparing against the planned groups for each synthesis (item #5)).                                                      |
|                               | 13b    | Describe any methods required to prepare the data for presentation or synthesis, such as handling of missing data, conversions.                                                                                                                                      |
|                               | 13c    | Describe any methods used to tabulate or visually display results of individual studies and syntheses.                                                                                                                                                               |
|                               | 13d    | Describe any methods used to synthesize results and provide a rationale for the choice(s). If meta-analysis was done, describe the model(s), method(s) to identify the presence and extent of statistical heterogeneity, and software packages used.                 |
|                               | 13e    | Describe any methods used to explore possible causes of heterogeneity among study results (e.g. subgroup analysis).                                                                                                                                                  |
|                               | 13f    | Describe any sensitivity analyses conducted to assess robustness of the synthesized results.                                                                                                                                                                         |
| Reporting bias assessment     | 14     | Describe any methods used to assess risk of bias due to missing results in a synthesis (arising from reporting bias).                                                                                                                                                |
| Certainty assessment          | 15     | Describe any methods used to assess certainty (or confidence) in the body of evidence for an outcome.                                                                                                                                                                |
| <b>RESULTS</b>                |        |                                                                                                                                                                                                                                                                      |
| Study selection               | 16a    | Describe the results of the search and selection process, from the number of records identified in the search to the number included in the review, ideally using a flow diagram.                                                                                    |
|                               | 16b    | Cite studies that might appear to meet the inclusion criteria, but which were excluded, and explain why they were excluded.                                                                                                                                          |
| Study characteristics         | 17     | Cite each included study and present its characteristics.                                                                                                                                                                                                            |
| Risk of bias in studies       | 18     | Present assessments of risk of bias for each included study.                                                                                                                                                                                                         |
| Results of individual studies | 19     | For all outcomes, present, for each study: (a) summary statistics for each group (where appropriate) and measures of precision (e.g. confidence/credible interval), ideally using structured tables or plots.                                                        |
| Results of syntheses          | 20a    | For each synthesis, briefly summarise the characteristics and risk of bias among contributing studies.                                                                                                                                                               |
|                               | 20b    | Present results of all statistical syntheses conducted. If meta-analysis was done, present for each the summary estimate (e.g. confidence/credible interval) and measures of statistical heterogeneity. If comparing groups, describe the results of the comparison. |
|                               | 20c    | Present results of all investigations of possible causes of heterogeneity among study results.                                                                                                                                                                       |
|                               | 20d    | Present results of all sensitivity analyses conducted to assess the robustness of the synthesized results.                                                                                                                                                           |
| Reporting biases              | 21     | Present assessments of risk of bias due to missing results (arising from reporting biases) for each synthesis.                                                                                                                                                       |
| Certainty of evidence         | 22     | Present assessments of certainty (or confidence) in the body of evidence for each outcome assessed.                                                                                                                                                                  |
| <b>DISCUSSION</b>             |        |                                                                                                                                                                                                                                                                      |
| Discussion                    | 23a    | Provide a general interpretation of the results in the context of other evidence.                                                                                                                                                                                    |
|                               | 23b    | Discuss any limitations of the evidence included in the review.                                                                                                                                                                                                      |

| Section and Topic                              | Item # | Checklist item                                                                                                                                                                                       |
|------------------------------------------------|--------|------------------------------------------------------------------------------------------------------------------------------------------------------------------------------------------------------|
|                                                | 23c    | Discuss any limitations of the review processes used.                                                                                                                                                |
|                                                | 23d    | Discuss implications of the results for practice, policy, and future research.                                                                                                                       |
| <b>OTHER INFORMATION</b>                       |        |                                                                                                                                                                                                      |
| Registration and protocol                      | 24a    | Provide registration information for the review, including register name and registration number, or state that a protocol was not prepared.                                                         |
|                                                | 24b    | Indicate where the review protocol can be accessed, or state that a protocol was not prepared.                                                                                                       |
|                                                | 24c    | Describe and explain any amendments to information provided at registration or in the protocol.                                                                                                      |
| Support                                        | 25     | Describe sources of financial or non-financial support for the review, and the role of the funders or sponsors.                                                                                      |
| Competing interests                            | 26     | Declare any competing interests of review authors.                                                                                                                                                   |
| Availability of data, code and other materials | 27     | Report which of the following are publicly available and where they can be found: template data collection forms; data used for all analyses; analytic code; any other materials used in the review. |

From: Page MJ, McKenzie JE, Bossuyt PM, Boutron I, Hoffmann TC, Mulrow CD, et al. The PRISMA 2020 statement: an updated guideline for reporting systematic reviews. *BMJ* 2021;372:n71. doi: 10.1136/bmj.n71

For more information, visit: <http://www.prisma-statement.org/>
